# Supplementary material
Source: PubMed Central journal article supplement (PMC2845545)

**SJ-NB12**  
**FANCI**

genes

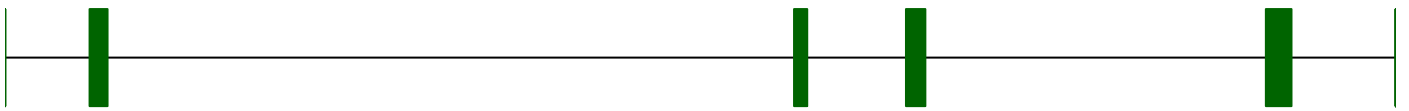

conservation

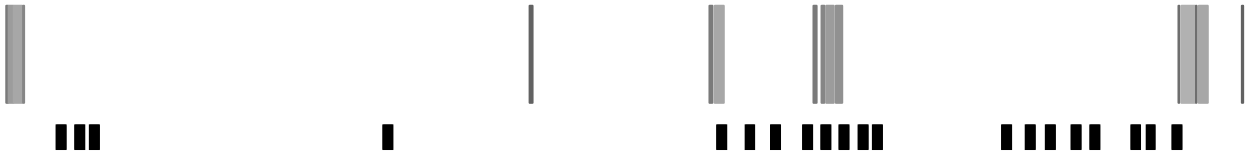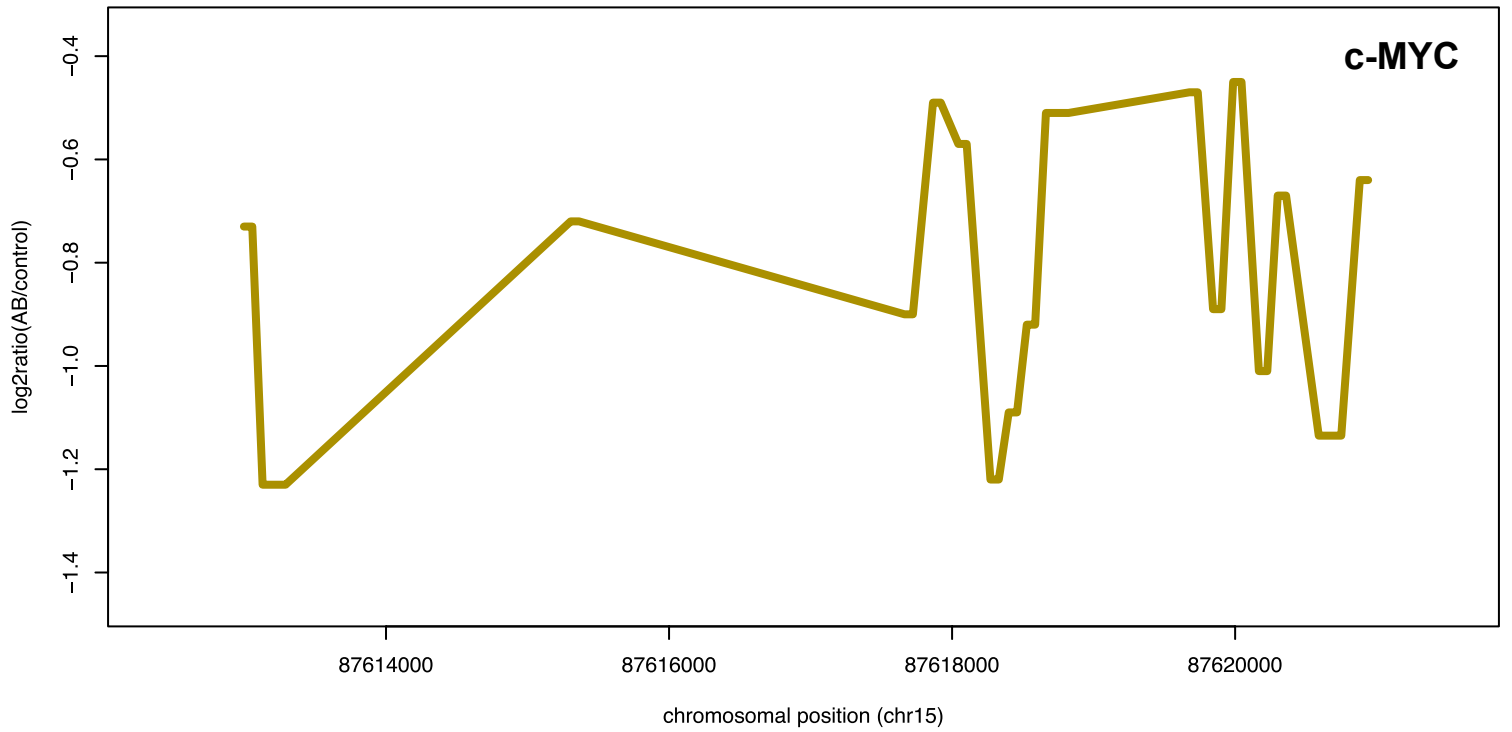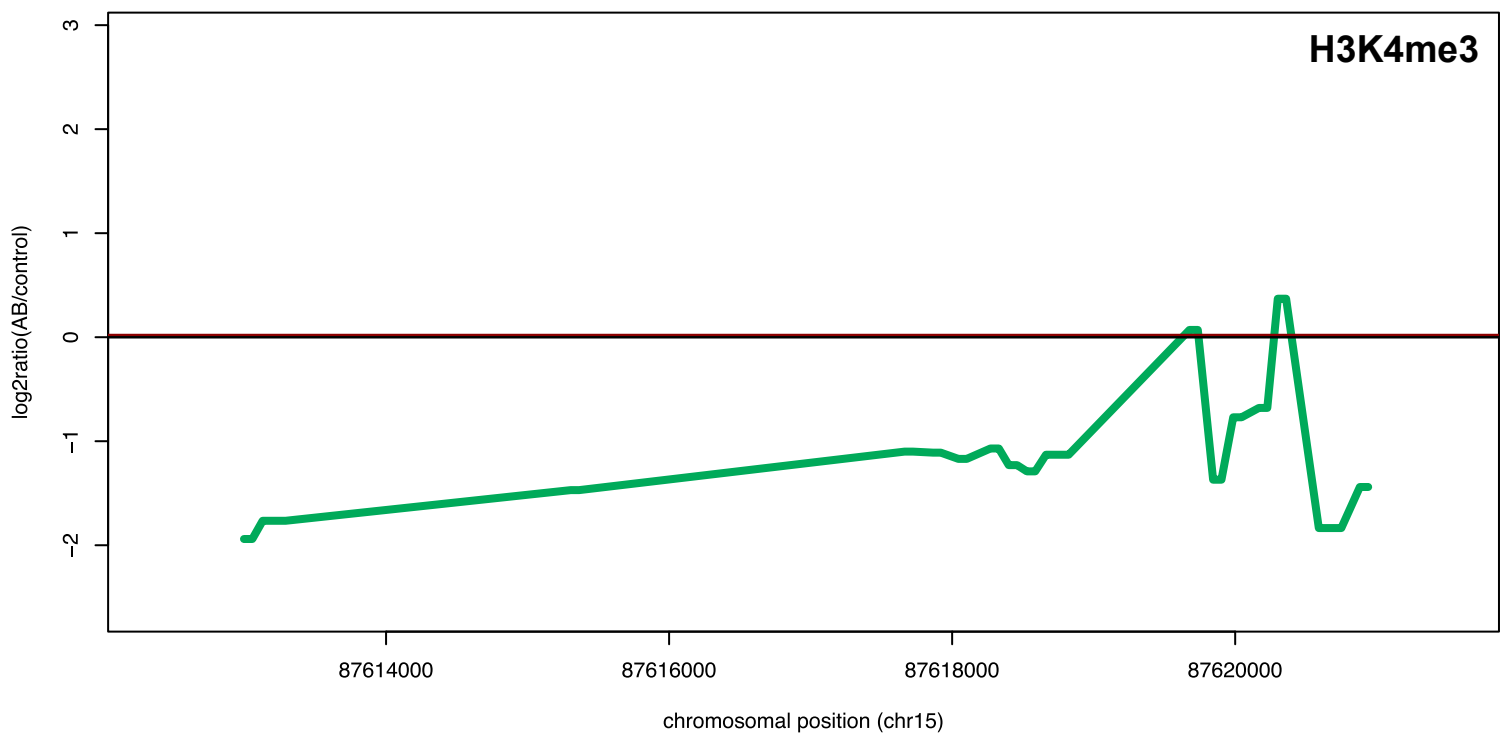

HSA-MIR-10a

CpG.islands

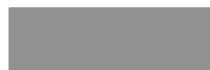

conservation

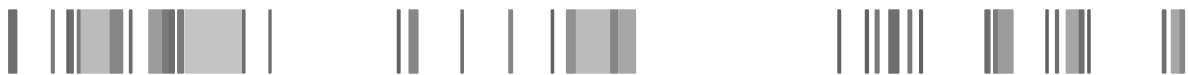

miRNA

10a

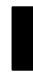

probe

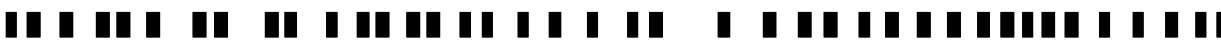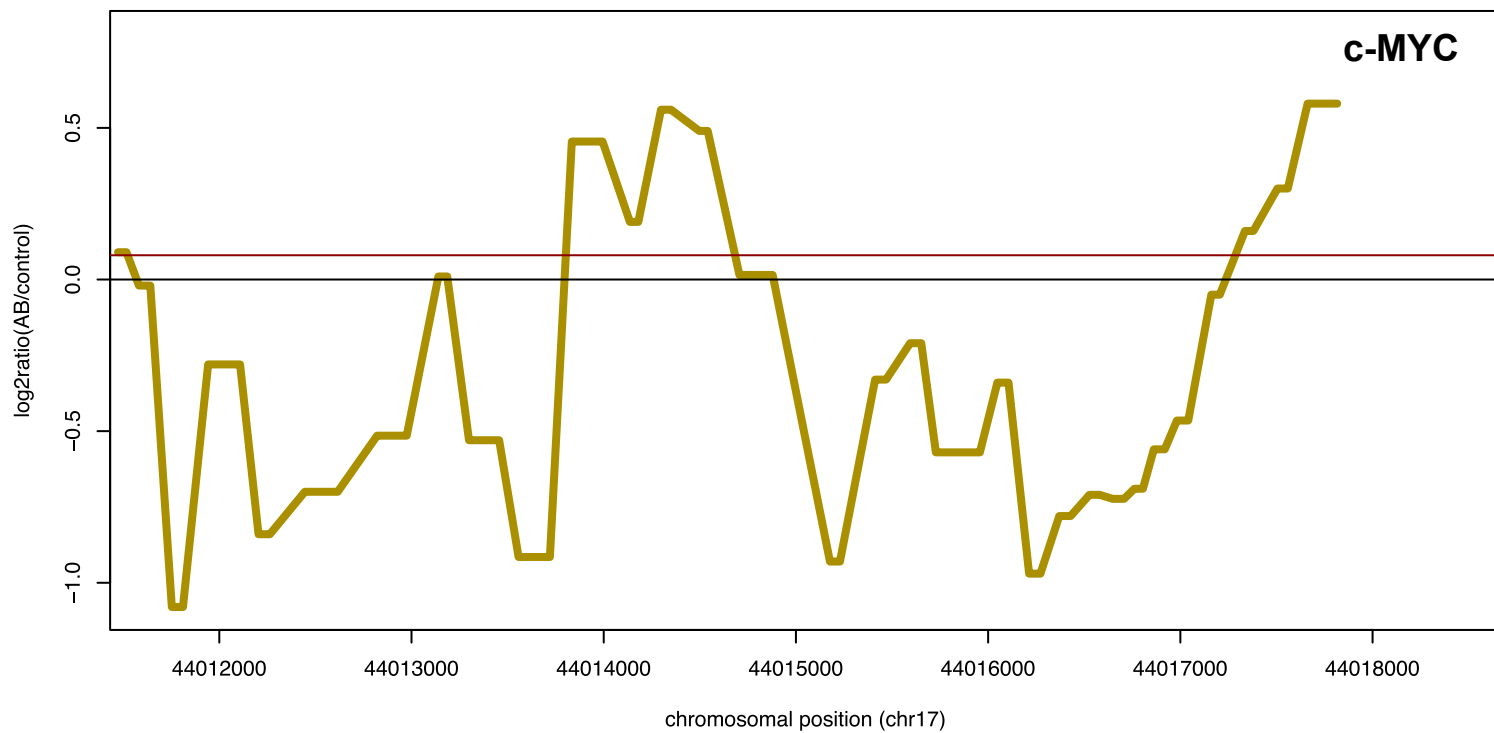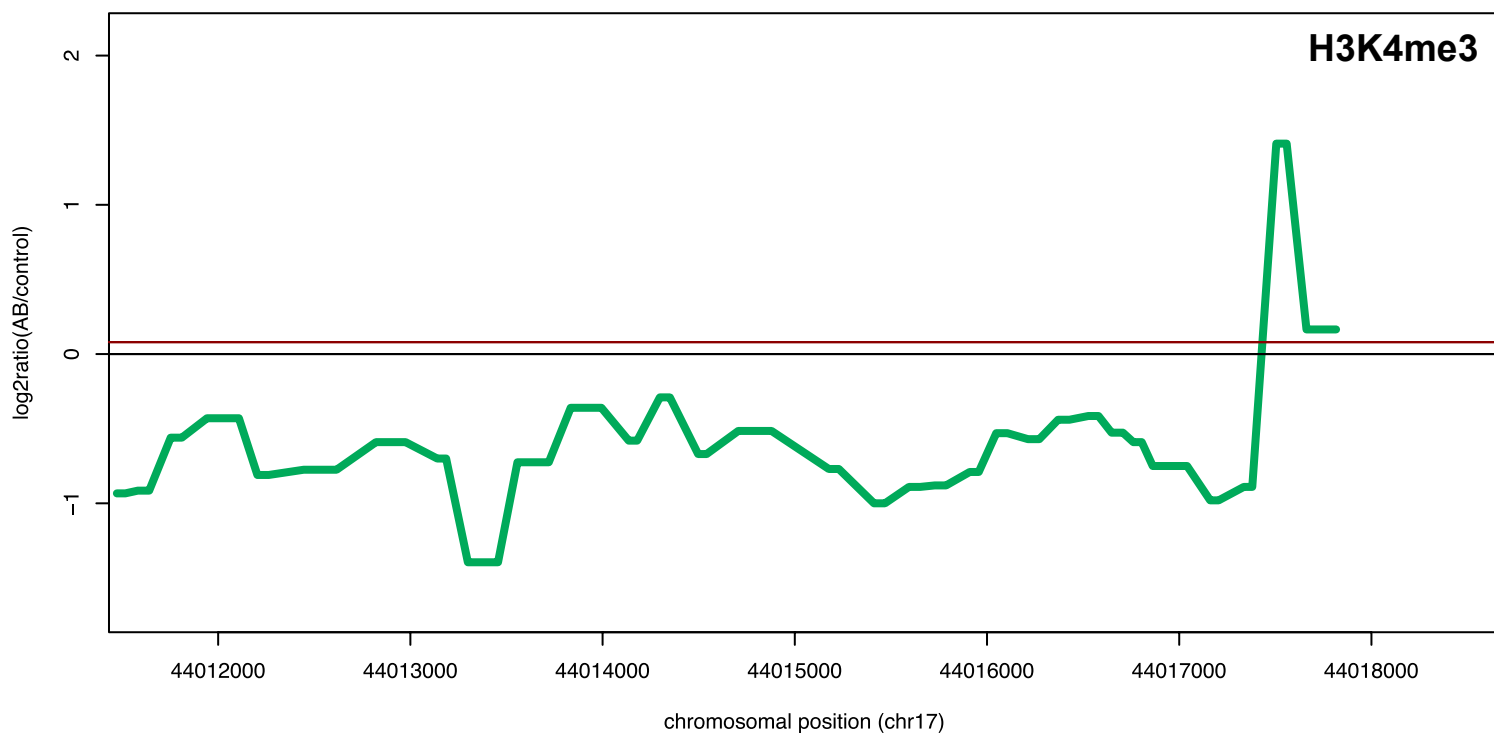

# SJ-NB12

## HSA-MIR-377

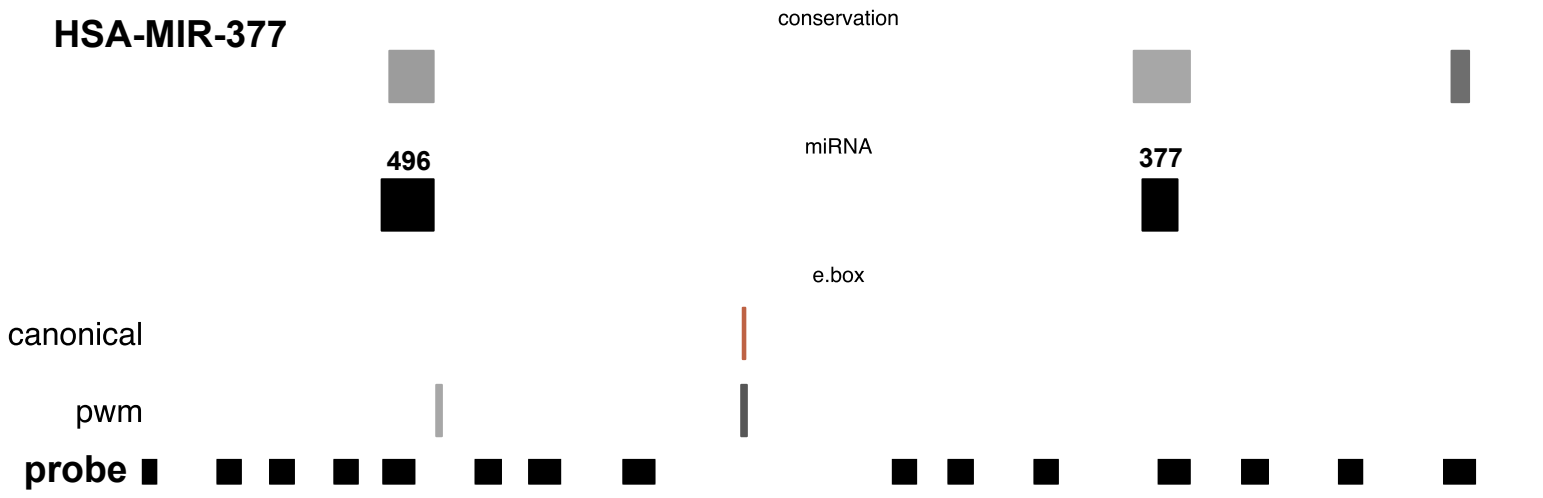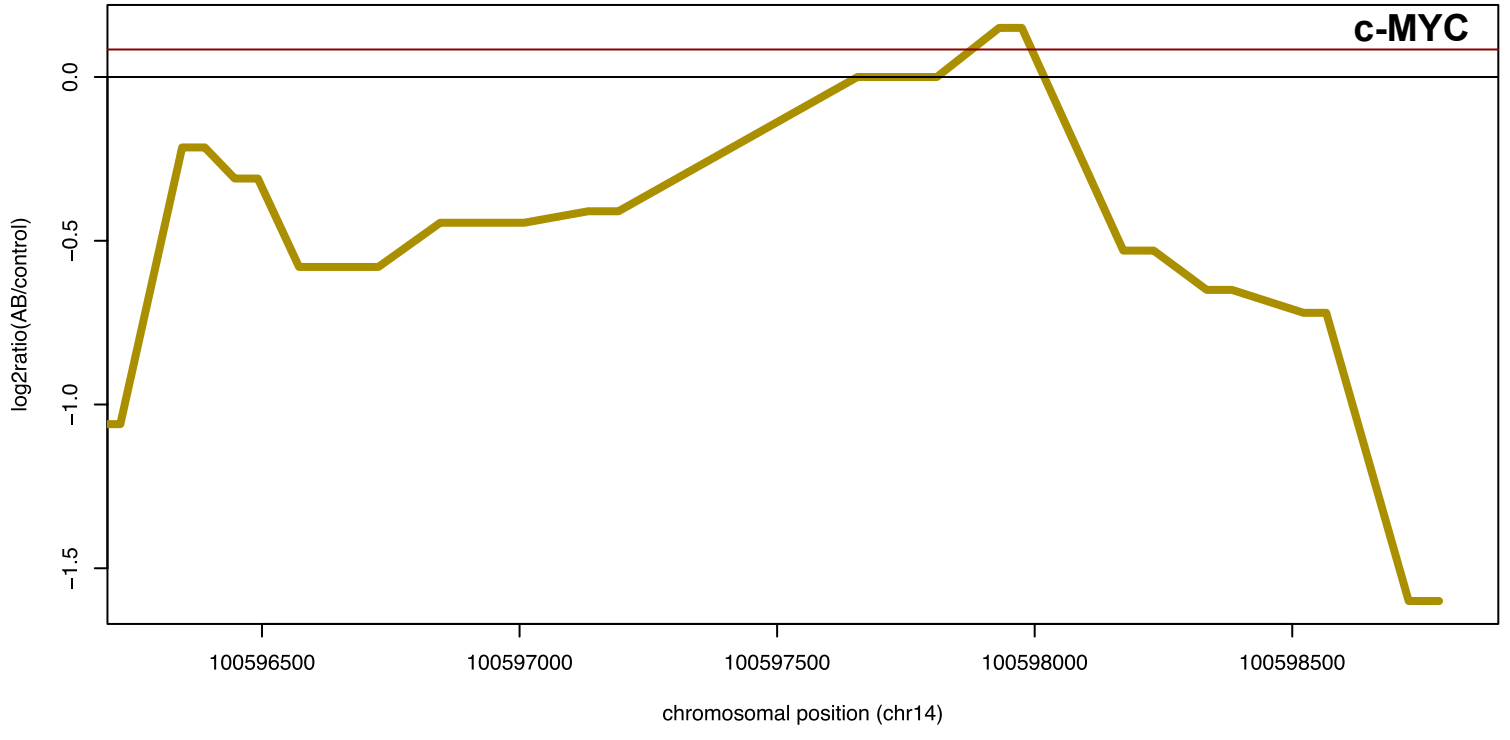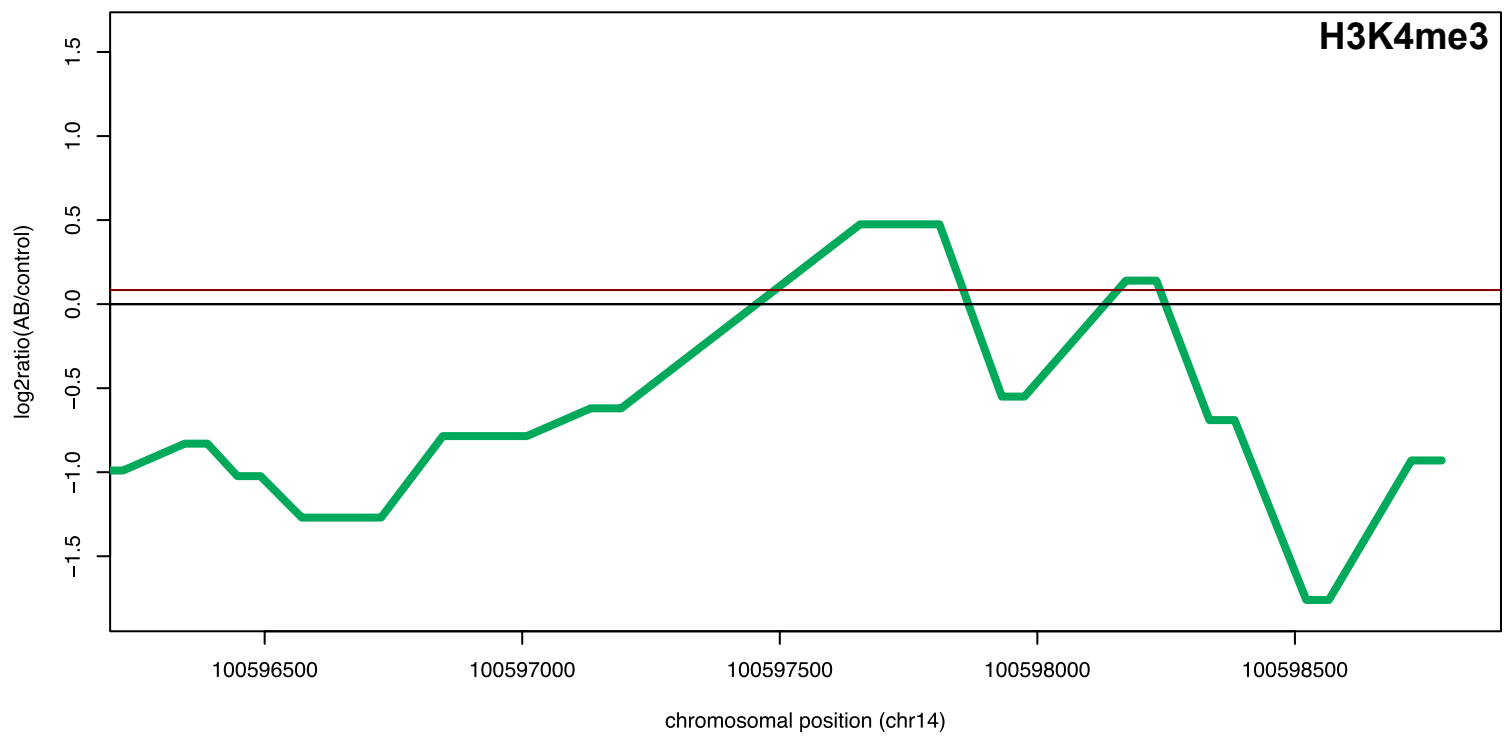

SJ-NB12

HSA-MIR-381

conservation

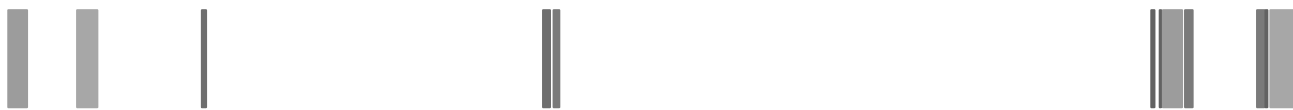

miRNA

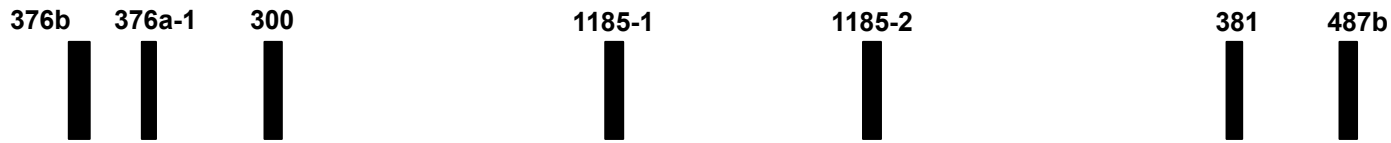

probe

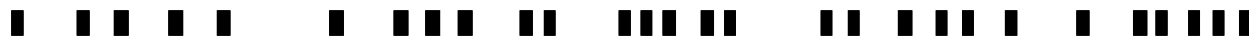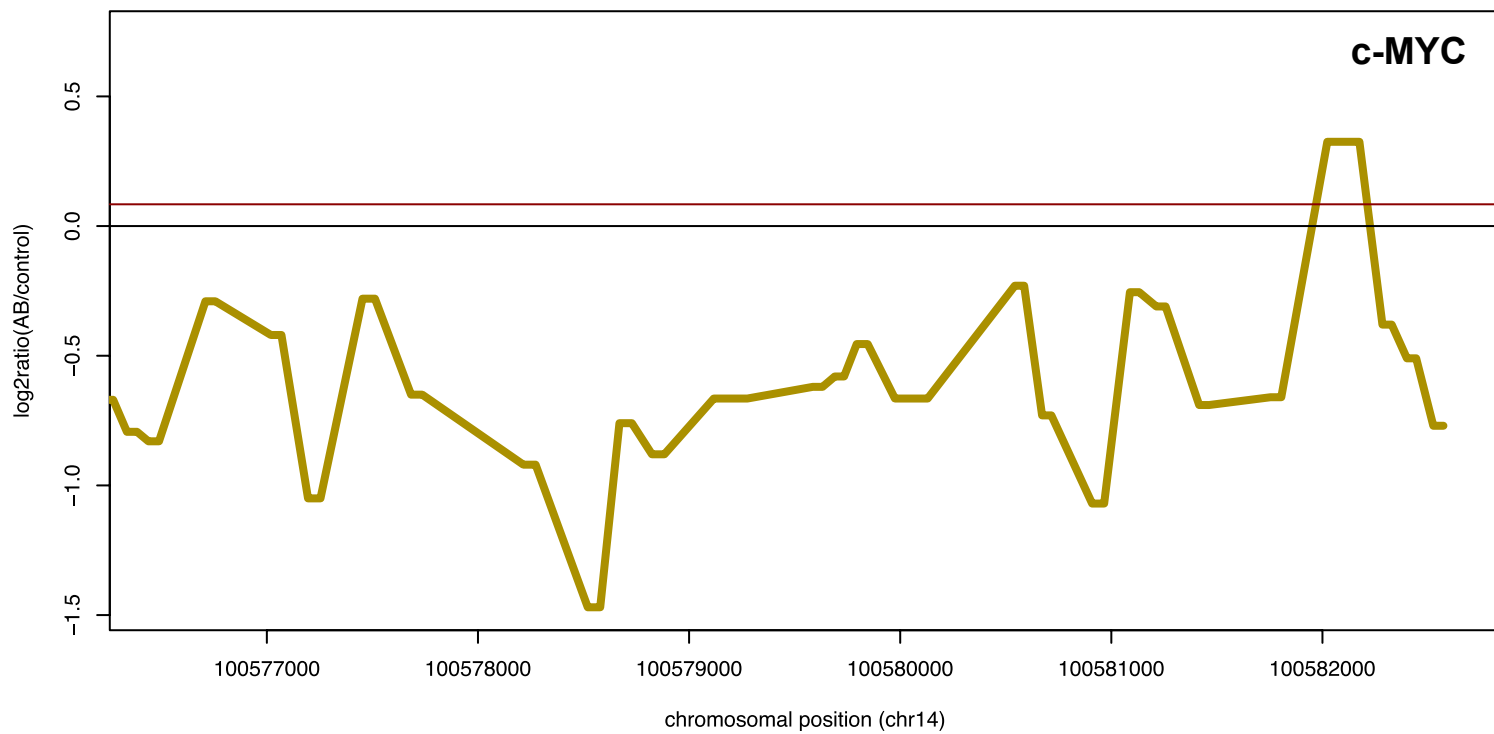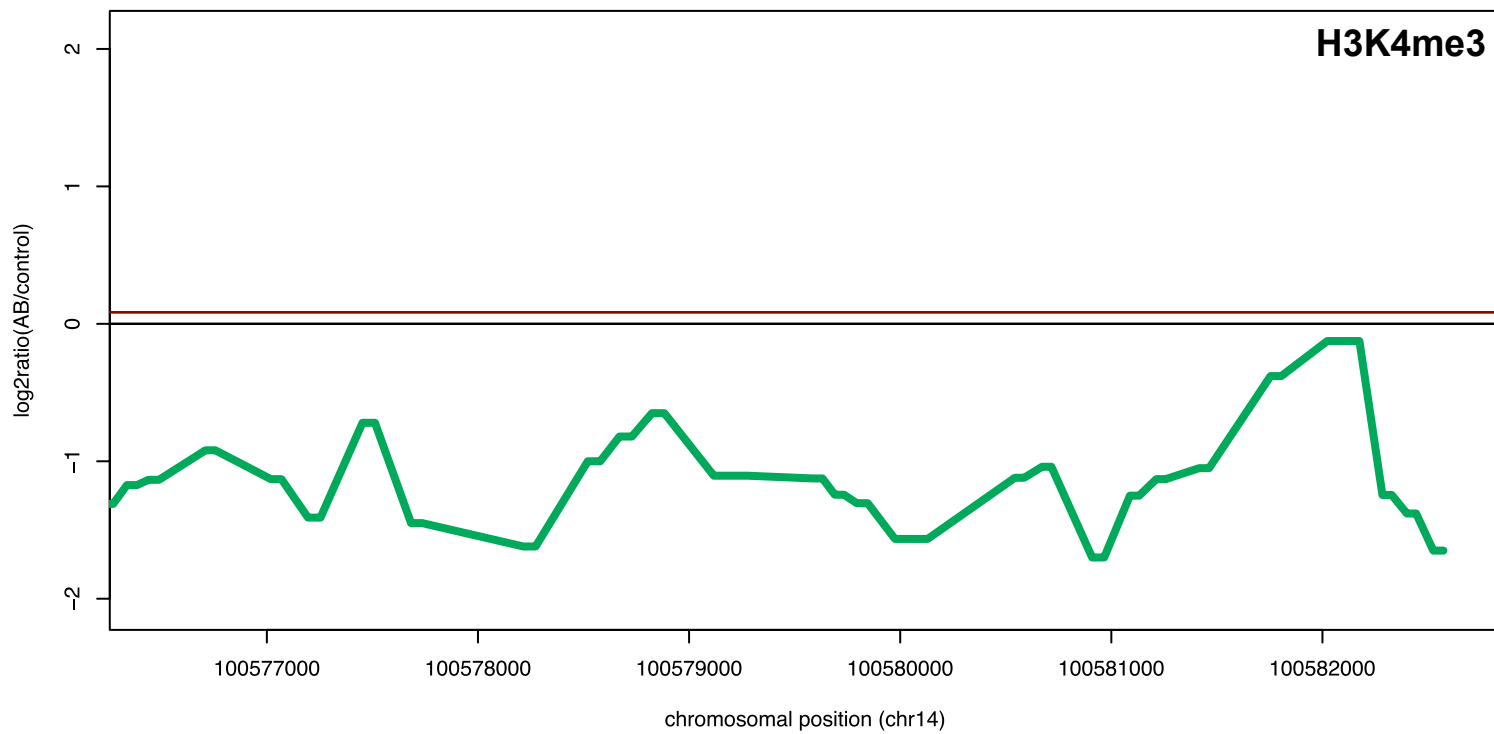

SJ-NB12  
HSA-MIR-452

genes **GABRE**

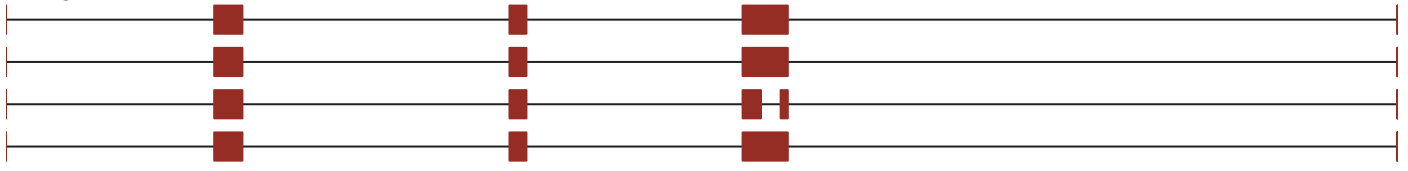

conservation

miRNA

e.box

452

canonical  
pwm

probe

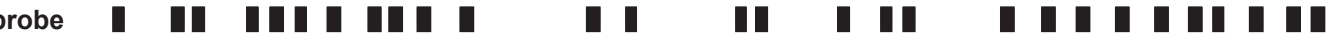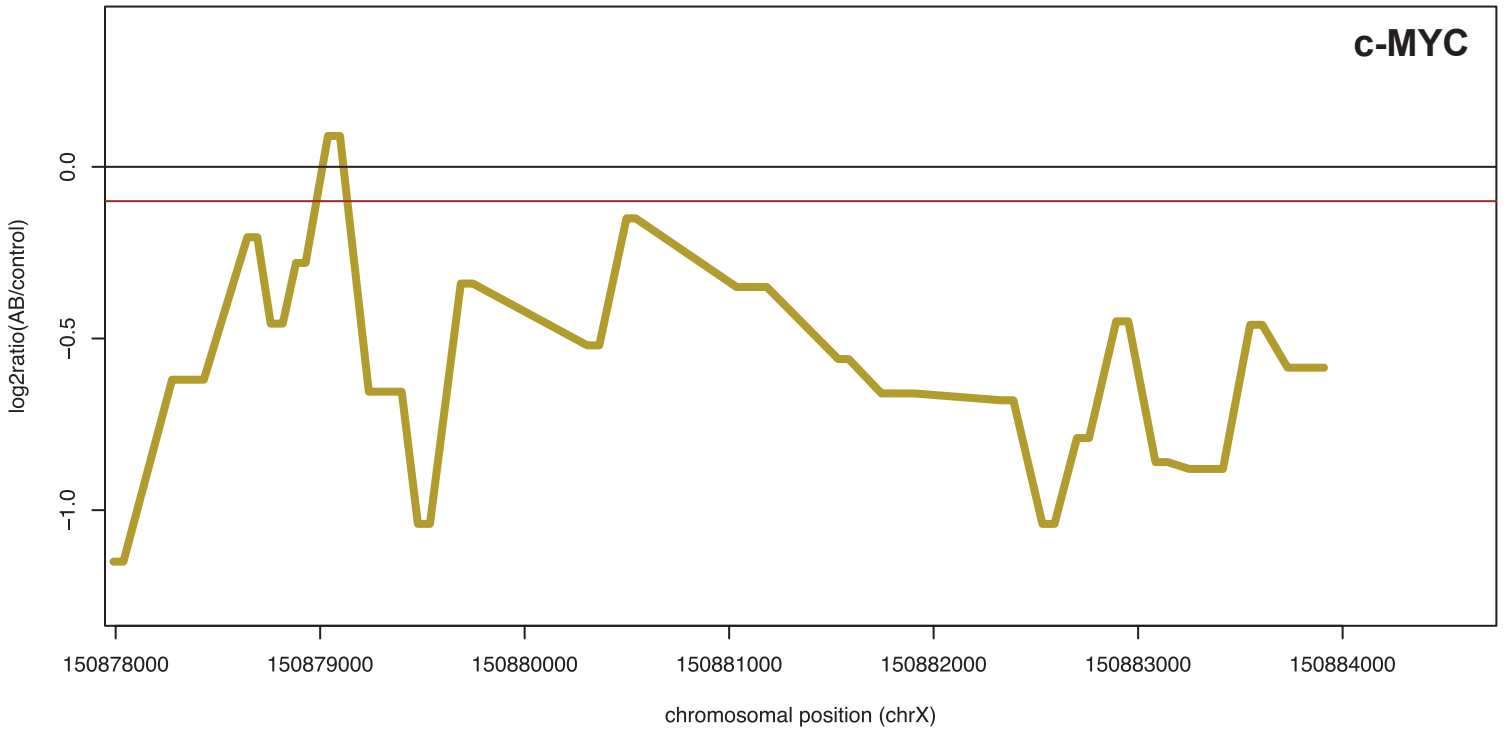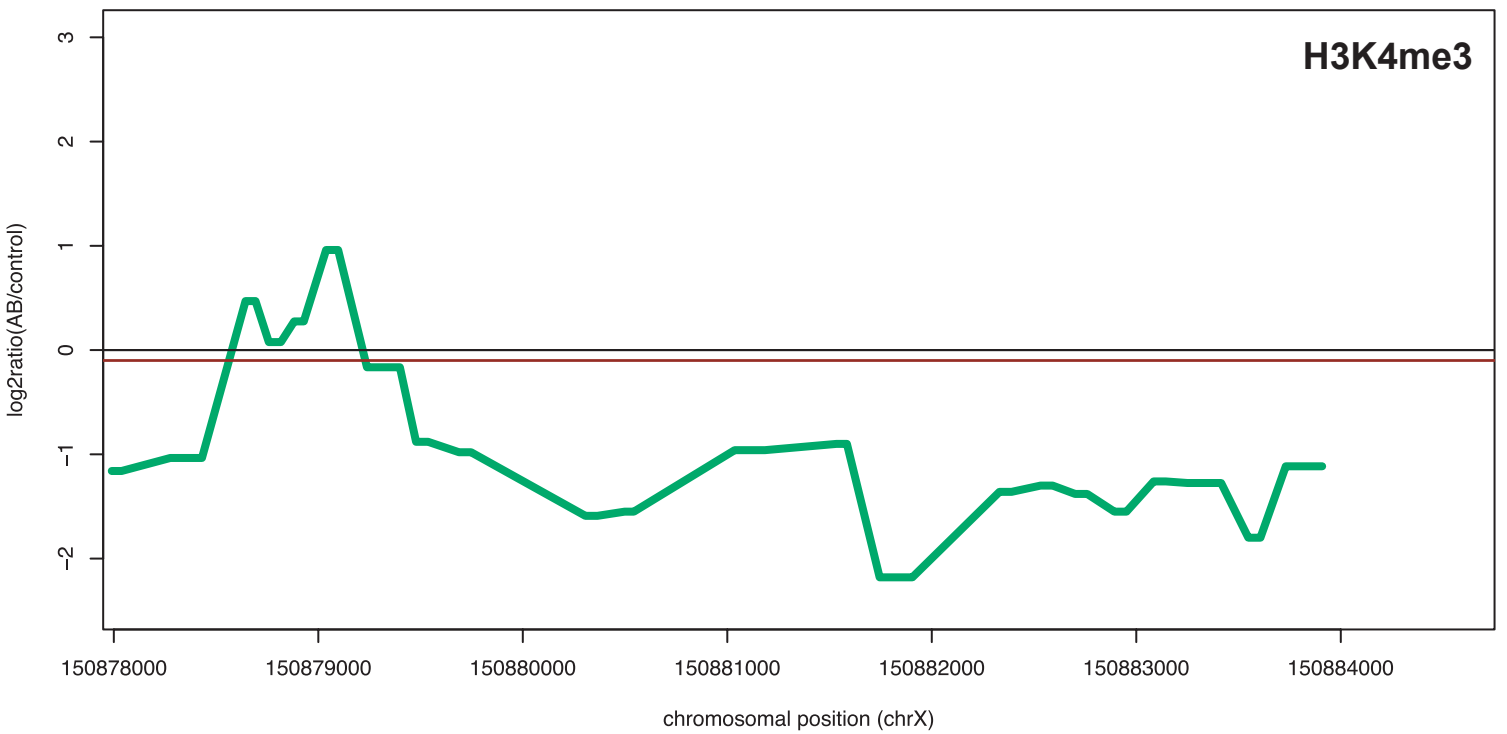

Supplement: NIHMS178418-supplement-3.pdf [file NIHMS178418-supplement-3.pdf]
